# Supplementary material for: ZNF281 enhances cardiac reprogramming by modulating cardiac and inflammatory gene expression
Source: PubMed Central journal article supplement — Genes Dev. 2017 Sep 1;31(17):1770–83. doi: 10.1101/gad.305482.117 (PMC5666675; doi:10.1101/gad.305482.117), 2017-09-01
Supplement: supp_31.17.1770_Supplemental_Data.pdf [file supp_31.17.1770_Supplemental_Data.pdf]

## Supplemental Materials

ZNF281 enhances cardiac reprogramming by modulating cardiac and inflammatory  
gene expression

Huanyu Zhou, Maria Gabriela Morales, Hisayuki Hashimoto, Matthew E. Dickson,  
Kunhua Song, Wenduo Ye, Min S. Kim, Hanspeter Niederstrasser, Zhaoning Wang,  
Beibei Chen, Bruce A. Posner, Rhonda Bassel-Duby and Eric N. Olson

**Supplemental Table 1**; related to Figure 1.

**Supplemental Table 2**; related to Figure 1.

**Supplemental Table 3**; related to the “quantitative mRNA measurement” in Materials and Methods section.

**Supplemental Table 4**; related to the “ChIP-seq, gene ontology and pathway analysis” and “RNA-seq” and gene ontology analysis” in Materials and Methods section.

**Supplemental Figure S1**; related to Figure 1.

**Supplemental Figure S2**; related to Figure 2.

**Supplemental Figure S3**; related to Figure 3.

**Supplemental Figure S4**; related to Figure 4.

**Supplemental Figure S5**; related to Figure 6.

**Supplemental Table S1.** Genes included in human retroviral ORF cDNA library.

| Gene Symbol |
|-------------|-------------|-------------|-------------|-------------|-------------|-------------|-------------|
| AATF        | BMP8A       | CEBPE       | CTNNB1      | ESR2        | GDF3        | HOXA5       | IL17D       |
| ADIPOQ      | BRPF1       | CEBPG       | CUX1        | ESRRA       | GDF6        | HOXA6       | IL17F       |
| ADNP        | BRPF3       | CERS1       | CX3CL1      | ETS1        | GIN1        | HOXA7       | IL18        |
| AEBP1       | BUD31       | CERS2       | CXCL10      | ETS2        | GLIS3       | HOXB1       | IL19        |
| AFF4        | C17ORF77    | CERS4       | CXCL11      | ETV3        | GMEB1       | HOXB13      | IL1A        |
| AHR         | C1QTNF4     | CFL2        | CXCL12      | ETV7        | GPBP1       | HOXB5       | IL1B        |
| AIMP1       | C21ORF66    | CHIA        | CXCL13      | FAM3B       | GPER        | HOXB6       | IL1F3       |
| ALS2CR8     | CBFA2T2     | CIR1        | CXCL14      | FAM3D       | GPI         | HOXB7       | IL1F5       |
| ALX1        | CBFA2T3     | CITED1      | CXCL16      | FASLG       | GREM1       | HOXB9       | IL1F6       |
| ARGFX       | CBFB        | CITED2      | CXCL3       | FBLN1       | GREM2       | HOXC4       | IL1F7       |
| ARID3A      | CBL         | CKLF        | CXCL5       | FEV         | GRN         | HOXC5       | IL1F8       |
| ARNT        | CBX5        | CLCF1       | CXCL6       | FL1         | GTF2H2      | HOXC6       | IL2         |
| ARNT2       | CBX6        | CMTM1       | CXCL9       | FLI1        | GTF2H2C     | HOXC8       | IL20        |
| ASCL1       | CBX7        | CMTM2       | DBT         | FLT3LG      | GTF2H3      | HOXD1       | IL22        |
| ASCL2       | CBX8        | CMTM3       | DLX1        | FOS         | GTF2H4      | HOXD10      | IL23A       |
| ASXL1       | CCDC104     | CMTM4       | DLX3        | FOSB        | GTF2I       | HOXD3       | IL24        |
| ATAD3B      | CCDC69      | CMTM5       | DLX4        | FOSL1       | GTF2IRD1    | HOXD4       | IL25        |
| ATF2        | CCL1        | CMTM6       | DLX6        | FOSL2       | HAT1        | HOXD8       | IL26        |
| ATF4        | CCL11       | CMTM7       | DMBX1       | FOXA1       | HBM         | HOXP        | IL27        |
| ATF5        | CCL13       | CMTM8       | DMRT1       | FOXA2       | HCFC1       | HSAL2       | IL28B       |
| ATF6        | CCL14       | CNBP        | DPPA4       | FOXA3       | HDAC1       | HSF1        | IL31        |
| ATF6B       | CCL15       | CNOT7       | DRAP1       | FOXD4       | HDAC3       | HSFY2       | IL32        |
| ATF7        | CCL17       | CNTF        | DRGX        | FOXD4L6     | HDAC4       | ID1         | IL33        |
| ATOH1       | CCL18       | CNTNAP3     | E2F2        | FOXJ1       | HDAC7       | IFNA10      | IL34        |
| AURKA       | CCL2        | COBLL1      | E2F3        | FOXJ2       | HDAC8       | IFNA13      | IL36G       |
| AURKB       | CCL21       | CPA3        | E2F6        | FOXL1       | HES1        | IFNA14      | IL4         |
| AURKC       | CCL22       | CPB2        | E2F7        | FOXL2       | HES6        | IFNA16      | IL6         |
| BARX1       | CCL23       | CREB1       | E2F8        | FOXM1       | HESX1       | IFNA17      | IL7         |
| BATF        | CCL24       | CREB3       | E4F1        | FOXN3       | HEYL        | IFNA2       | IL8         |
| BATF2       | CCL25       | CREB3L2     | EBF1        | FOXO3       | HHEX        | IFNA21      | IL9         |
| BATF3       | CCL26       | CREB3L4     | EBI3        | FOXP1       | HIF3A       | IFNA4       | ILF10       |
| BCL6        | CCL27       | CREB5       | EDF1        | FOXP3       | HINFP       | IFNA5       | ING2        |
| BLZF1       | CCL28       | CREBL2      | EDN1        | FOXP4       | HIRA        | IFNA6       | ING3        |
| BMP1        | CCL3        | CREBRF      | EGR2        | FUBP1       | HLF         | IFNA7       | INHA        |
| BMP10       | CCL3L3      | CREM        | EHF         | GABPA       | HLX         | IFNA8       | INHBB       |
| BMP2        | CCL4        | CRHR2       | ELF1        | GABPB1      | HLX1        | IFNE        | IRF1        |
| BMP3        | CCL4L1      | CRLF1       | ELF2        | GAS7        | HMG20B      | IFNG        | IRF2        |
| BMP5        | CCL5        | CRX         | ELF4        | GATA1       | HMGA1       | IFNW1       | IRF3        |
| BMP8A       | CCL7        | CSDA        | ELF5        | GATA2       | HMGB        | IKZF1       | IRF4        |
| BRPF1       | CCL8        | CSF1        | ELK1        | GATA3       | HMGB1       | IKZF3       | IRF5        |
| BRPF3       | CD2         | CSF2        | ELK3        | GATA5       | HMGB2       | IL10        | IRF6        |
| BUD31       | CD200R1     | CSF3        | ELK4        | GATAD1      | HNF1A       | IL11        | IRF8        |
| C17ORF77    | CD40LG      | CSRNP3      | EMB         | GATAD2A     | HNF1B       | IL12B       | IRF9        |
| C1QTNF4     | CD99P1      | CSRP2BP     | END1        | GATAD2B     | HNF4A       | IL13        | IRX2        |
| C21ORF66    | CDYL        | CTBP1       | ERF         | GBX2        | HNRNPAB     | IL15        | IRX3        |
| CBFA2T2     | CDYL2       | CTBP2       | ERG         | GDF10       | HOPX        | IL16        | IRX6        |
| CBFA2T3     | CEBPB       | CTCF        | ESAM        | GDF15       | HOXA1       | IL17A       | ISL1        |
| BMP8A       | CEBPD       | CTF1        | ESR1        | GDF2        | HOXA11      | IL17C       | ISL2        |

|         |         |        |         |          |           |         |         |
|---------|---------|--------|---------|----------|-----------|---------|---------|
| JDP2    | MIF     | NR1D2  | POU4F3  | SIX5     | TCEAL1    | TSC22D4 | ZNF189  |
| JUN     | MITA3   | NR1H3  | POU6F1  | SLC30A9  | TCF12     | TSLP    | ZNF19   |
| JUNB    | MITF    | NR1H3  | PPARA   | SLURP1   | TCF19     | TULP4   | ZNF192  |
| KAT5    | MLX     | NR1I2  | PPARG   | SMAD1    | TCF25     | TWIST2  | ZNF207  |
| KAT7    | MLXIPL  | NR1I3  | PPBP    | SMAD2    | TCF7      | UBP1    | ZNF207  |
| KAY7    | MMP14   | NR2C2  | PRDM1   | SMAD3    | TCF7L2    | UNC50   | ZNF213  |
| KCNIP2  | MPLKIP  | NR2E1  | PRMT5   | SMAD4    | TEAD2     | USF1    | ZNF215  |
| KCNMB3  | MPO     | NR2E3  | PRMT6   | SMAD6    | TEAD3     | USF2    | ZNF232  |
| KDM1    | MSC     | NR2F1  | PROP1   | SNAI2    | TEAD4     | USP16   | ZNF24   |
| KDM1A   | MSL3    | NR2F2  | PRRX1   | SNAPC2   | TEF       | USP21   | ZNF256  |
| KITLG   | MSTN    | NR3C1  | PRRX2   | SNAPC5   | TFAP2C    | VAX1    | ZNF263  |
| KLF1    | MSX2    | NR4A1  | PTGER3  | SOX10    | TFAP2E    | VAX2    | ZNF268  |
| KLF10   | MTA1    | NR4A2  | PTH     | SOX13    | TFCP2     | VDR     | ZNF274  |
| KLF11   | MTA2    | NR5A1  | PTTG1   | SOX2     | TFCP2L1   | VEGFA   | ZNF277  |
| KLF12   | MXD1    | NR5A2  | RARB    | SOX5     | TFDP1     | VENTX   | ZNF281  |
| KLF3    | MYB     | NR6A1  | RARG    | SOX6     | TFDP2     | VSX2    | ZNF287  |
| KLF4    | MYBL2   | NRDB2  | RAX2    | SOX7     | TFE3      | WNT1    | ZNF34   |
| L3MBTL1 | MYC     | NRG1   | RBCK    | SOX8     | TFEB      | WNT2    | ZNF354A |
| L3MBTL4 | MYCL    | NXPE4  | RBPJ    | SOX9     | TFEC      | WNT5A   | ZNF37A  |
| LAMTOR5 | MYCN    | OLIG2  | RBPJL   | SP140    | TGFB2     | WT1     | ZNF394  |
| LASS6   | MYF6    | OSM    | RCAN1   | SPDEF    | TGIF1     | XBP1    | ZNF396  |
| LBX2    | MYOG    | OTP    | RELA    | SPI1     | TGIF2     | XCL1    | ZNF397  |
| LCOR    | MYT1    | OTX1   | RELB    | SPIB     | TGIF2LX   | XCL2    | ZNF41   |
| LEF1    | MZF1    | OTX2   | RENIN   | SPINK13  | THAPB     | YBX1    | ZNF444  |
| LEFTY1  | NAMPT   | PA2G4  | RFX3    | SPP1     | THRA      | YEATS4  | ZNF446  |
| LEFTY2  | NANOGP8 | PARS2  | RFX5    | SREBF1   | THRB      | YY1     | ZNF449  |
| LHX2    | NDOR1   | PAX4   | RFXANK  | SRF      | TLE4      | ZBTB18  | ZNF483  |
| LHX4    | NDP     | PAX5   | RFXAP   | SRY      | TLX2      | ZBTB25  | ZNF496  |
| LHX6    | NEK6    | PAX6   | RHOXF1  | STAT1    | TLX3      | ZBTB48  | ZNF639  |
| LHX9    | NEUROD1 | PAX8   | RHOXF2  | STAT3    | TMEM8C    | ZEB2    | ZNF69   |
| LIF     | NEUROD2 | PBX2   | RNF4    | STAT5    | TMOD1     | ZFP29   | ZNF71   |
| LMO4    | NEUROG3 | PCGF6  | RORB    | STAT5A   | TNF       | ZFP36L1 | ZNF75D  |
| LMX1A   | NFATC1  | PF4    | RTP3    | STAT5B   | TNFRSF11B | ZFP36L2 | ZNF83   |
| LMX1B   | NFATC3  | PFDN1  | RUNX1T1 | STAT6    | TNFSF13   | ZFP42   | ZNF85   |
| LRR8B   | NFE2    | PGBD1  | RUNX3   | SUPT4H1  | TNFSF13B  | ZFP69B  | ZRANB2  |
| LTA     | NFE2L1  | PGRMC2 | RXRA    | SUV420H1 | TNFSF15   | ZHX2    | ZSCAN1  |
| LTB     | NFE2L3  | PHC2   | RXRB    | TADA2A   | TNFSF18   | ZHX3    | ZSCAN12 |
| MAFB    | NFIC    | PHF5A  | RXRG    | TADA3    | TNFSF4    | ZIC3    | ZSCAN16 |
| MAFF    | NFIL3   | PHF6   | SALL2   | TADA3L   | TNFSF8    | ZKSCAN3 | ZSCAN18 |
| MAFG    | NFKB1   | PHF7   | SATB2   | TAF10    | TNLG8A    | ZKSCAN4 | ZSCAN20 |
| MARCH5  | NFYB    | PHOX2A | SCG2    | TAF12    | TP53      | ZKSCAN5 | ZSCAN21 |
| MARCKS5 | NFYC    | PHTF1  | SCGB3A1 | TAF5L    | TP63      | ZKSCAN7 | ZSCAN25 |
| MAX     | NKX2-1  | PITX1  | SCMH1   | TAF6     | TRAF3IP1  | ZKSCAN8 | ZSCAN26 |
| MBD1    | NKX2-3  | PITX2  | SECTM1  | TAF7     | TRIM22    | ZNF131  | ZSCAN31 |
| MDS1    | NKX2-5  | PKNOX1 | SETD3   | TARDBP   | TRIM25    | ZNF133  | ZSCAN4  |
| MECOM   | NKX2-8  | PKNOX2 | SETD4   | TBX2     | TRIM27    | ZNF134  | ZSCAN5A |
| MECP2   | NME2    | PLAGL2 | SETD8   | TBX20    | TRIM28    | ZNF140  | ZSCAN9  |
| MEF2A   | NOLC1   | POLD4  | SETDB1  | TBX21    | TRIM29    | ZNF165  |         |
| MEF2D   | NPAS2   | POU1F1 | SHOX    | TBX22    | TRIM58    | ZNF169  |         |
| MEIS2   | NR0B1   | POU2F1 | SHOX2   | TBX3     | TSC22D2   | ZNF174  |         |
| MEOX1   | NR0B2   | POU2F2 | SIX1    | TBX5     | TSC22D3   | ZNF175  |         |
| MICB    | NR1D1   | POU3F2 | SIX2    | TBX6     | TSC22D3   | ZNF18   |         |

**Supplemental Table S2.** Activators and inhibitors identified by screen from the human retroviral ORF cDNA library.

| <b>Activators</b>  |                     |                     |                    |                     |                     |
|--------------------|---------------------|---------------------|--------------------|---------------------|---------------------|
| <b>Gene Symbol</b> | <b>cTnT Z-score</b> | <b>αMHC Z-score</b> | <b>Gene Symbol</b> | <b>cTnT Z-score</b> | <b>αMHC Z-score</b> |
| <i>PHF7</i>        | 9.7                 | 7.4                 | <i>GTF2IRD1</i>    | 2.5                 | 7.2                 |
| <i>ZNF281</i>      | 7.0                 | 2.9                 | <i>ATF4</i>        | 2.4                 | 0.3                 |
| <i>LTA</i>         | 6.3                 | 0.0                 | <i>CD200R1</i>     | 2.3                 | 2.4                 |
| <i>RNF4</i>        | 4.6                 | 3.1                 | <i>HMGB2</i>       | 2.3                 | 1.7                 |
| <i>SMAD2</i>       | 4.5                 | 1.8                 | <i>CXCL10</i>      | 2.3                 | 0.2                 |
| <i>TP53</i>        | 4.4                 | 1.1                 | <i>AFF4</i>        | 2.2                 | 2.0                 |
| <i>ASCL1</i>       | 3.9                 | 0.0                 | <i>ATF2</i>        | 2.2                 | 1.2                 |
| <i>MSX2</i>        | 3.8                 | 2.9                 | <i>PPARA</i>       | 2.2                 | 2.2                 |
| <i>MTA1</i>        | 3.8                 | 1.7                 | <i>KITLG</i>       | 2.1                 | 1.6                 |
| <i>SHOX2</i>       | 3.6                 | 1.6                 | <i>NFYC</i>        | 2.0                 | 0.0                 |
| <i>NXPE4</i>       | 3.6                 | 0.3                 | <i>SPP1</i>        | 2.0                 | 1.4                 |
| <i>TAF6</i>        | 3.5                 | 4.0                 | <i>CMTM3</i>       | 1.9                 | 2.6                 |
| <i>HHEX</i>        | 3.4                 | 1.1                 | <i>TRIM28</i>      | 1.9                 | 2.2                 |
| <i>TFDP1</i>       | 3.3                 | 3.4                 | <i>ZSCAN26</i>     | 1.6                 | 2.0                 |
| <i>SIX2</i>        | 3.3                 | 0.0                 | <i>VENTX</i>       | 1.5                 | 2.8                 |
| <i>MYBL2</i>       | 3.3                 | 2.9                 | <i>AHR</i>         | 1.3                 | 2.0                 |
| <i>NR6A1</i>       | 3.2                 | 1.7                 | <i>IFNA16</i>      | 1.3                 | 2.1                 |
| <i>TCF19</i>       | 3.2                 | 1.7                 | <i>IL18</i>        | 1.2                 | 2.2                 |
| <i>PAX4</i>        | 3.2                 | 0.7                 | <i>IFNA2</i>       | 1.1                 | 2.8                 |
| <i>NANOGP8</i>     | 3.1                 | 1.4                 | <i>HLF</i>         | 0.6                 | 2.9                 |
| <i>PLAGL2</i>      | 3.0                 | 1.5                 | <i>SOX6</i>        | 0.5                 | 3.3                 |
| <i>CREM</i>        | 2.9                 | 0.3                 | <i>MAX</i>         | 0.5                 | 2.2                 |
| <i>ELF1</i>        | 2.8                 | 1.8                 | <i>IL10</i>        | 0.3                 | 2.3                 |
| <i>BATF</i>        | 2.7                 | 0.6                 | <i>MEF2D</i>       | 0.2                 | 2.0                 |
| <b>Inhibitors</b>  |                     |                     |                    |                     |                     |
| <b>Gene Symbol</b> | <b>cTnT Z-score</b> | <b>αMHC Z-score</b> | <b>Gene Symbol</b> | <b>cTnT Z-score</b> | <b>αMHC Z-score</b> |
| <i>HOXC4</i>       | -4.2                | -5.6                | <i>NFE2</i>        | -2.8                | -2.1                |
| <i>OLIG2</i>       | -4.1                | -5.4                | <i>ZNF397</i>      | -2.7                | -3.9                |
| <i>JUN</i>         | -4.0                | -4.1                | <i>USF2</i>        | -2.7                | -4.8                |
| <i>LHX4</i>        | -3.8                | -3.3                | <i>HNF4A</i>       | -2.7                | -4.5                |
| <i>HOXD4</i>       | -3.6                | -4.0                | <i>NR5A1</i>       | -2.6                | -4.7                |
| <i>TLE4</i>        | -3.5                | -4.3                | <i>IL2</i>         | -2.6                | -3.7                |
| <i>POU2F1</i>      | -3.4                | -4.9                | <i>FUBP1</i>       | -2.5                | -2.9                |
| <i>HOXB9</i>       | -3.3                | -3.7                | <i>IRF4</i>        | -2.5                | -3.1                |
| <i>DLX3</i>        | -3.2                | -4.0                | <i>CEBPE</i>       | -2.3                | -3.1                |
| <i>FOXA3</i>       | -3.1                | -4.3                | <i>NR4A1</i>       | -2.3                | -3.8                |
| <i>FOSL1</i>       | -3.0                | 0.4                 | <i>AIMP1</i>       | -2.2                | -2.7                |
| <i>SRF</i>         | -3.0                | -1.5                | <i>PAX6</i>        | -2.2                | -3.2                |
| <i>PHOX2A</i>      | -3.0                | -2.6                | <i>TLX3</i>        | -2.2                | -2.4                |
| <i>ZFP36L1</i>     | -3.0                | -1.2                | <i>SPDEF</i>       | -2.1                | -2.6                |
| <i>SOX10</i>       | -2.9                | -2.8                | <i>FOS</i>         | -2.1                | 0.3                 |
| <i>HOXD10</i>      | -2.9                | -4.2                | <i>SOX9</i>        | -2.1                | -2.0                |
| <i>LHX9</i>        | -2.8                | -3.4                | <i>TGIF2</i>       | -2.1                | -3.6                |
| <i>DBT</i>         | -2.8                | -5.0                | <i>ZHX2</i>        | -2.1                | -1.7                |
| <i>NR3C1</i>       | -2.0                | -0.6                | <i>IKZF3</i>       | -1.3                | -2.1                |
| <i>CTF1</i>        | -2.0                | -1.8                | <i>E4F1</i>        | -1.2                | -2.3                |
| <i>TFEB</i>        | -2.0                | -1.0                | <i>FL1</i>         | -1.2                | -2.1                |
| <i>PITX2</i>       | -2.0                | -2.7                | <i>ERG</i>         | -1.2                | -2.1                |

|         |      |      |         |      |      |
|---------|------|------|---------|------|------|
| SOX7    | -2.0 | -2.4 | HOXD3   | -1.2 | -2.2 |
| HNF1B   | -1.9 | -2.2 | IL1A    | -1.2 | -2.2 |
| SNAI2   | -1.9 | -3.7 | PITX1   | -1.2 | -2.7 |
| FASLG   | -1.9 | -4.6 | NEUROD1 | -1.1 | -2.2 |
| HOXA6   | -1.9 | -2.2 | ZBTB48  | -1.1 | -2.5 |
| OTX1    | -1.8 | -4.3 | TFAP2E  | -1.1 | -2.2 |
| FAM3B   | -1.8 | -2.2 | OTP     | -1.1 | -3.8 |
| NKX2-5  | -1.8 | -2.8 | SOX8    | -1.1 | -2.8 |
| ESR1    | -1.8 | -5.0 | MECP2   | -1.1 | -3.9 |
| HOXB6   | -1.7 | -2.3 | CREB5   | -1.1 | -2.0 |
| DLX4    | -1.7 | -3.9 | FOXA2   | -1.0 | -3.8 |
| TBX2    | -1.7 | -2.8 | PBX2    | -1.0 | -3.4 |
| HOXC6   | -1.6 | -2.9 | DLX1    | -1.0 | -3.8 |
| NR4A2   | -1.6 | -5.3 | NKX2-1  | -1.0 | -3.9 |
| RHOXF1  | -1.6 | -3.9 | PAX5    | -1.0 | -2.1 |
| TFCP2L1 | -1.6 | -3.3 | FOXL2   | -0.9 | -2.3 |
| HOXC5   | -1.6 | -2.7 | POU3F2  | -0.9 | -3.1 |
| DLX6    | -1.5 | -2.5 | TBX3    | -0.9 | -3.6 |
| MEOX1   | -1.5 | -3.6 | FEV     | -0.9 | -2.9 |
| CX3CL1  | -1.5 | -2.5 | MBD1    | -0.9 | -3.3 |
| IL11    | -1.5 | -2.2 | TGIF1   | -0.8 | -2.6 |
| HOXA11  | -1.5 | -2.3 | ZNF639  | -0.8 | -2.2 |
| HOXD8   | -1.5 | -2.5 | PRDM1   | -0.8 | -3.8 |
| SPIB    | -1.5 | -2.5 | POU4F3  | -0.8 | -2.0 |
| ETS1    | -1.4 | -4.2 | EGR2    | -0.7 | -5.3 |
| TEAD3   | -1.4 | -2.6 | KLF3    | -0.7 | -2.6 |
| HOXB5   | -1.4 | -2.0 | FAM3D   | -0.6 | -2.7 |
| DMRT1   | -1.4 | -2.4 | MIF     | -0.6 | -2.6 |
| HNF1A   | -1.4 | -2.3 | ARGFX   | -0.4 | -3.5 |
| TNFSF4  | -1.4 | -2.2 | CMTM2   | -0.4 | -2.4 |
| RORB    | -1.4 | -2.2 | PRRX2   | 0.0  | -2.1 |
| ZIC3    | -1.4 | -2.6 | BMP2    | 0.5  | -3.2 |
| IL26    | -1.4 | -3.1 | CXCL13  | 0.6  | -2.0 |
| CSRNP3  | -1.4 | -2.9 | ATOH1   | 1.2  | -2.2 |
| TARDBP  | -1.4 | -2.5 | PTGER3  | 1.2  | -2.3 |
| ELF4    | -1.3 | -2.1 | GDF2    | 1.3  | -3.0 |
| HOXB13  | -1.3 | -2.3 | PPARG   | 1.6  | -4.4 |
| CEBPB   | -1.3 | -2.1 | CXCL5   | 2.5  | -3.8 |
| NR2E1   | -1.3 | -4.1 | NR0B2   | 2.8  | -2.2 |
| SMAD3   | -1.3 | -2.1 | CRX     | 7.5  | -3.6 |
| ALX1    | -1.3 | -3.2 | NR2F1   | 9.4  | -2.8 |
| NFIC    | -1.3 | -2.0 | OTX2    | 9.5  | -2.3 |
| FOXA1   | -1.3 | -2.1 |         |      |      |

Genes with Z-scores of  $\alpha$ MHC-GFP or cTnT expression  $\geq 2$  were defined as activators. Genes with Z-scores of  $\alpha$ MHC or cTnT expression  $\leq -2$  were defined as inhibitors.

**Supplemental Table S3.** q-PCR primer list

| <b>Gene</b>   | <b>Forward (5'-3')</b>   | <b>Reverse (5'-3')</b>  |
|---------------|--------------------------|-------------------------|
| <i>Myh6</i>   | GCCCAGTACCTCCGAAAGTC     | GCCTTAACATACTCCTCCTTGTC |
| <i>Actc1</i>  | CGGACAATTTACGTTTCAGCA    | CTGGATTCTGGCGATGGTGTA   |
| <i>Nppa</i>   | GCTTCCAGGCCATATTGGAG     | GGGGGCATGACCTCATCTT     |
| <i>Col1a2</i> | TCGTGCCTAGCAACATGCC      | TTTGTGAGAATACTGAGCAGCAA |
| <i>Sox9</i>   | AGTACCCGCATCTGCACAAC     | ACGAAGGGTCTCTTCTCGCT    |
| <i>IL6</i>    | TAGTCCTTCCTACCCCAATTTCC  | TTGGTCCTTAGCCACTCCTTC   |
| <i>Ccl2</i>   | TTAAAAACCTGGATCGGAACCAA  | GCATTAGCTTCAGATTTACGGGT |
| <i>Ptgs1</i>  | GATTGTACTIONCGCACGGGCTAC | GGATAAGGTTGGACCGCACT    |
| <i>Gapdh</i>  | AGGTCGGTGTGAACGGATTTG    | TGTAGACCATGTAGTTGAGGTCA |

**Supplemental Table S4.** RNA-seq and ChIP-seq deposited data

| <b>Experiment</b>                | <b>SRA accession number</b> |
|----------------------------------|-----------------------------|
| GATA4_6F (ChIP-seq)              | SAMN07312820                |
| GATA4_6F_minus ZNF281(ChIP-seq)  | SAMN07312821                |
| ZNF281_6F (ChIP-seq)             | SAMN07312822                |
| ZNF281_6F_minus GATA4(ChIP-seq)  | SAMN07312823                |
| IgG control (ChIP-seq)           | SAMN07312824                |
| AGHMT_plus_E_Rep1 (RNA-seq)      | SAMN07312825                |
| AGHMT_plus_E_Rep2 (RNA-seq)      | SAMN07312826                |
| AGHMT_plus_E_Rep3 (RNA-seq)      | SAMN07312827                |
| AGHMT_plus_ZNF281_Rep1 (RNA-seq) | SAMN07312828                |
| AGHMT_plus_ZNF281_Rep2 (RNA-seq) | SAMN07312829                |
| AGHMT_plus_ZNF281_Rep3 (RNA-seq) | SAMN07312830                |

## Supplemental Figures

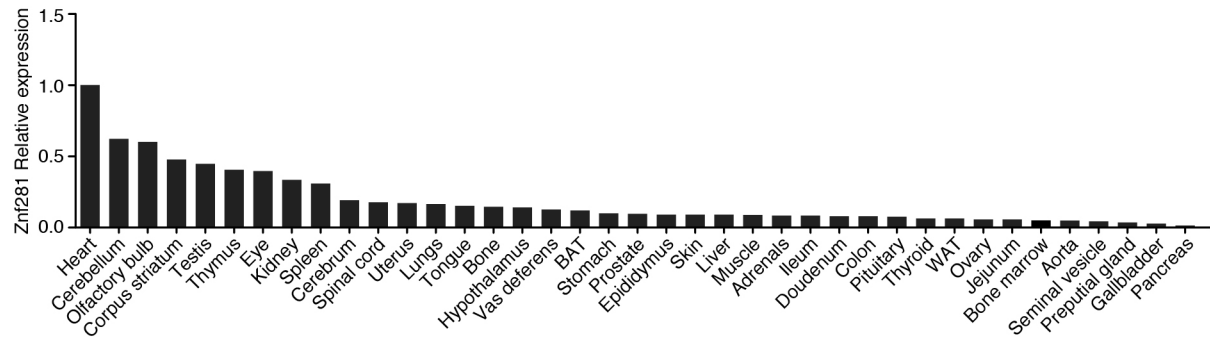

**Supplemental Figure S1.** ZNF281 mRNA expression profile. Transcript levels of ZNF281 in different tissues isolated from adult wild type C57BL6 mice, as determined with quantitative PCR.



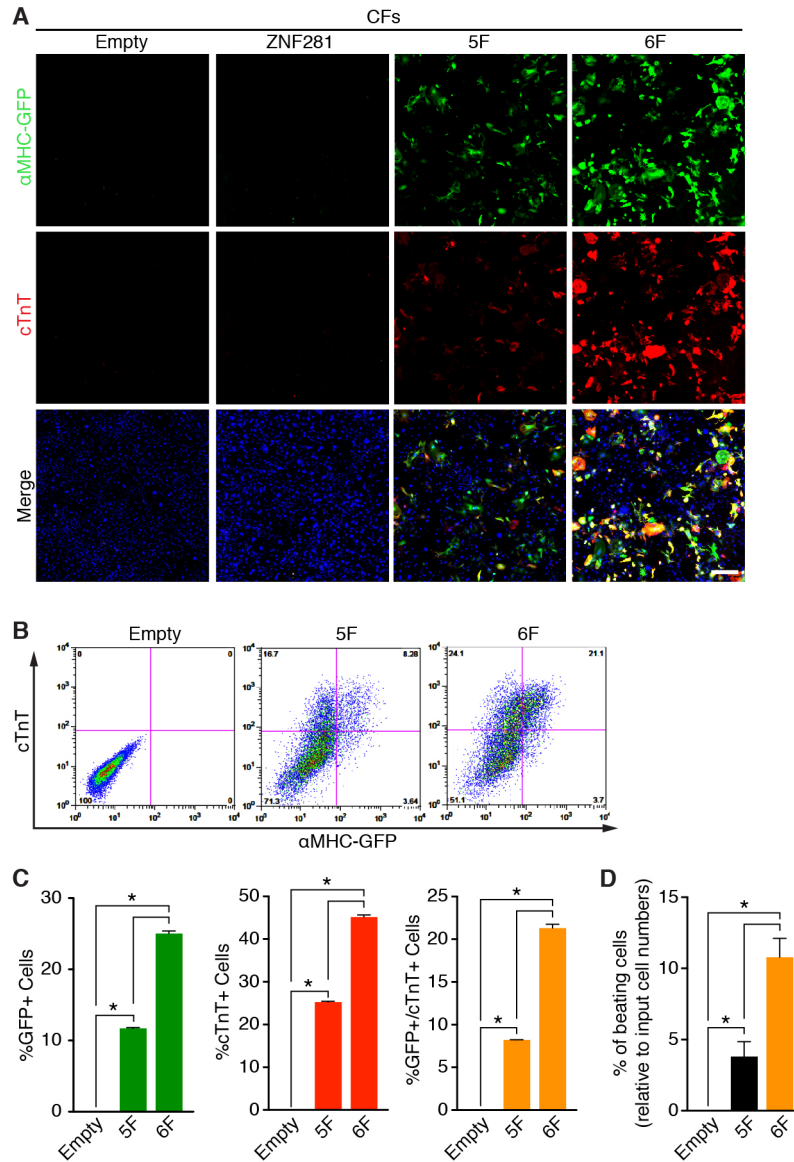

**Supplemental Figure S2.** ZNF281 enhances cardiac reprogramming of adult cardiac fibroblasts. (A) Immunocytochemistry images of adult  $\alpha$ MHC-GFP transgenic CFs 7 days post-infection with Empty, ZNF281, 5F, or 6F (5F+ZNF281) retroviruses.  $\alpha$ MHC-GFP (green), cTnT (red), Hoechst (blue). Scale bars: 500  $\mu$ m. (B-C) Representative flow cytometry plot (B) and analyses (C) of  $\alpha$ MHC-GFP+ and cTnT+ CFs 7 days post-infection with Empty, 5F, or 6F retrovirus. \*  $P < 0.05$ . (D) Percentage of beating cells, relative to the number of input cells after 4 weeks post-infection with Empty, ZNF281, 5F, or 6F (5F+ZNF281) retroviruses.

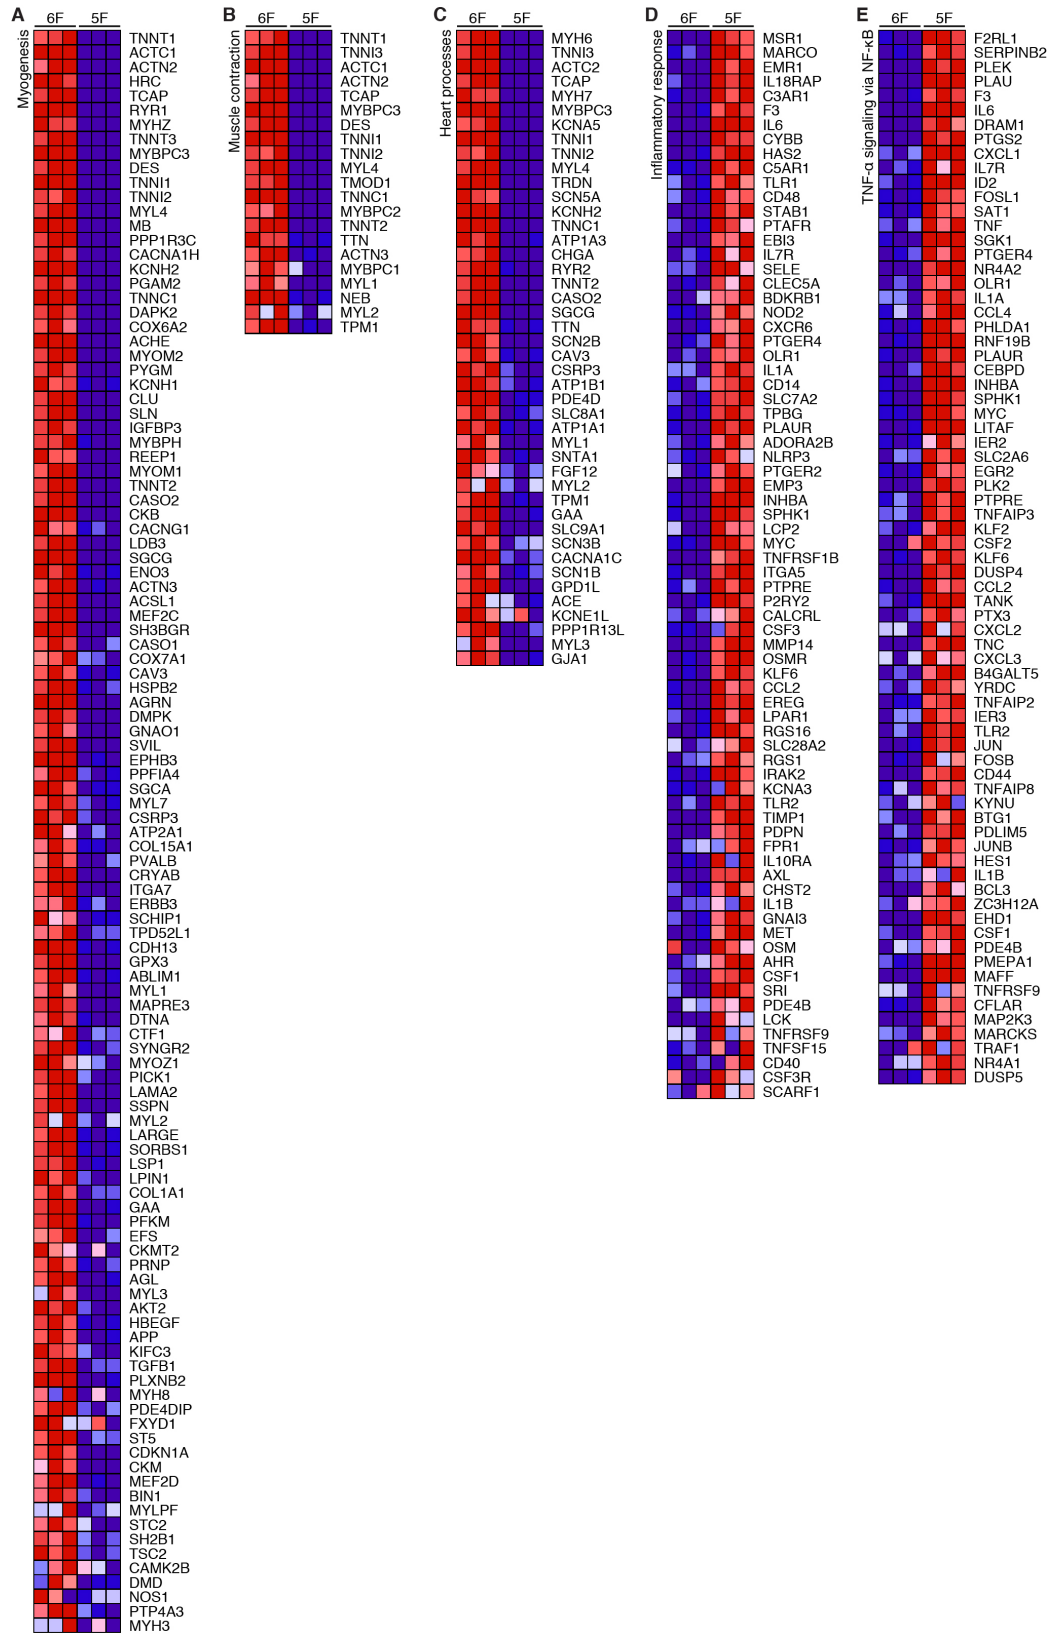

**Supplemental Figure S3.** Gene set enrichment analyses of induced by ZNF281 in cardiac reprogramming. (A-E) Heat maps of the indicated gene-set were generated with the genes that constitute the core enrichment group.

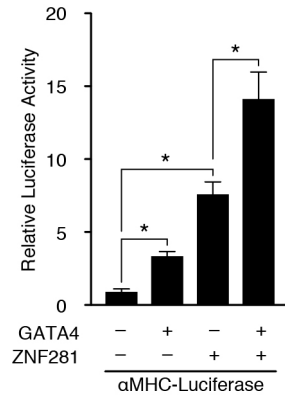

**Supplemental Figure S4.** Luciferase reporter assays were performed using HEK293 cells transfected with equal amounts of ZNF281 and/or GATA4 expression plasmids, as indicated, along with  $\alpha$ MHC-luciferase reporter plasmid. \*  $P < 0.05$ .

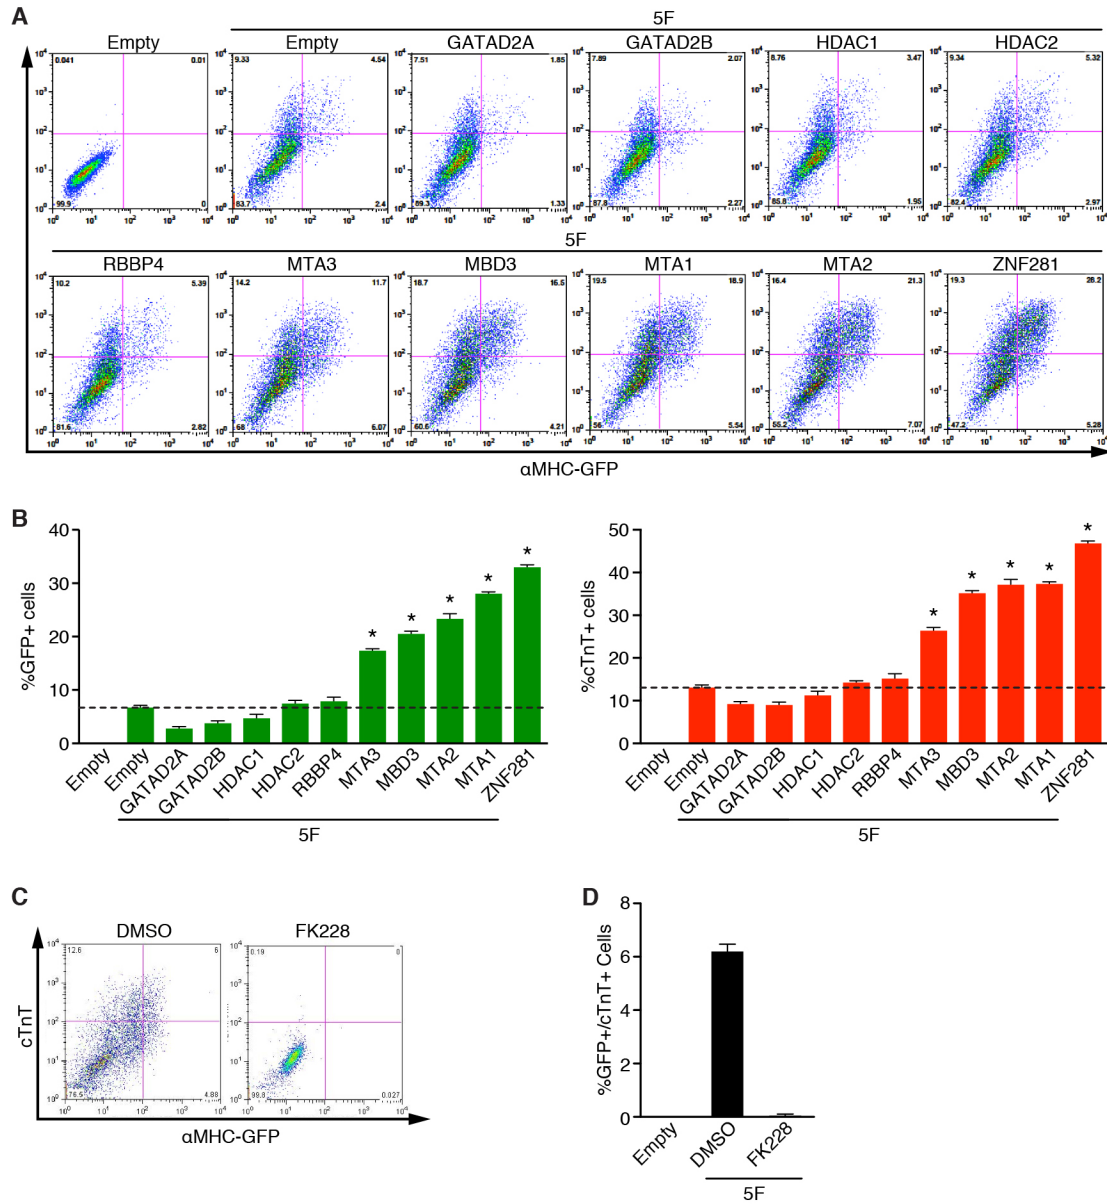

**Supplemental Figure S5.** ZNF281 represses the inflammatory response through the NuRD complex. (A) Representative flow cytometry plot of TTFs 7 days post-infection with Empty, 5F plus Empty, ZNF281 or each individual NuRD complex subunit retroviruses. (B) Quantification of αMHC-GFP+ and cTnT+ cells from flow cytometry plots from A. (C) Representative flow cytometry plot of TTFs 7 days post-infection with Empty, 5F plus DMSO and 5F plus FK228. (D) Quantification of αMHC-GFP+ and cTnT+ cells from flow cytometry plots from C.
